# Supplementary material for: Nesfatin-1 in Human Milk and Its Association with Infant Anthropometry
Source: MDPI journal article supplement (doi:10.3390/nu15010176), 2022-12-30

**Figure S1.** Directed acyclic graph showing hypothesized interactions with infant sex, birth weight, and milk formula supplementation

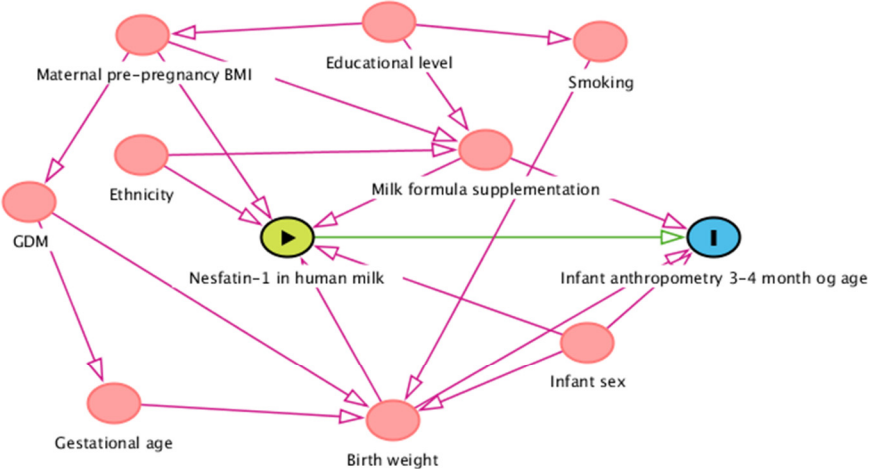

Supplement: s1 [file s1]
