# Supplementary material for: Nesfatin-1 in Human Milk and Its Association with Infant Anthropometry
Source: MDPI journal article supplement (doi:10.3390/nu15010176), 2022-12-30
Supplement: s1 [file s1]

Table S1. Unadjusted multivariate linear regressions for log[nesfatin-1] and anthropometrical values

| Explanatory Variables                   | Log[nesfatin]<br>ng/mL            |
|-----------------------------------------|-----------------------------------|
| Outcome measure                         | $\beta$ (95% CI) P                |
| $\Delta$ Weight since birth (g)         | 24.16 (-313.7-362.0) <b>0.89</b>  |
| $\Delta$ WAZ since birth (SD)           | 0.19 (-0.20-0.59) <b>0.34</b>     |
| $\Delta$ Weight since birth per day (g) | 0.68 (-1.81-3.18) <b>0.59</b>     |
| Length at sampling (cm)                 | -0.30 (-1.27-0.67) <b>0.55</b>    |
| Weight at sampling (g)                  | -88.0 (-489.1-313.08) <b>0.66</b> |
| Abdominal circumference (cm)            | -0.05 (-1.18-1.08) <b>0.93</b>    |
| Triceps skinfold thickness (mm)         | -0.02 (-0.65-0.61) <b>0.95</b>    |
| Subscapular skinfold thickness (mm)     | -0.11 (-0.57-0.36) <b>0.65</b>    |
| WAZ (SD)                                | -0.07 (-0.51-0.36) <b>0.74</b>    |
| HAZ (SD)                                | -0.09 (-0.48-0.29) <b>0.63</b>    |
| WHZ (SD)                                | -0.007 (-0.39-0.37) <b>0.97</b>   |
| BMIZ (SD)                               | -0.021 (-0.42-0.38) <b>0.92</b>   |

The critical value of p at a false discovery rate of 5% was 0.004.
